# Supplementary material
Source: HighWire-hosted journal article supplement (https://ard.bmj.com/content/79/1/53)
Supplement: inline-supplementary-material-2 [file inline-supplementary-material-2.pdf]

**Table S2:** Key themes (n=13) and the respective research questions formulated after the first EULAR Task Force meeting for the “EULAR recommendations for the generic core competences of Health Professionals in Rheumatology”

| Theme |                                                                                            | Research question                                                                                                                      |
|-------|--------------------------------------------------------------------------------------------|----------------------------------------------------------------------------------------------------------------------------------------|
| 1.    | Knowledge, assessment & recognition of RMDs                                                | a. What knowledge do HPRs have on RMDs?<br>b. How do HPRs identify and assess patients’ resources and limitations?                     |
| 2.    | Knowledge, assessment & recognition of comorbidities and associated diseases               | Are HPRs able to identify the signs, symptoms, risks, red flags and comorbidities in RMDs?                                             |
| 3.    | Interdisciplinary co-operation/ communication and coordination of care                     | What is the role of HPRs within the interdisciplinary team for the care of people with RMDs?                                           |
| 4.    | HPR interface between clinician and patient                                                | What are the competences needed to optimize communication and advocacy between HPRs, physicians and people with RMDs and their carers? |
| 5.    | Medication effects, management of side-effects, knowledge of pharmacological interventions | What competences do HPRs need to explain and support patients’ pharmacological treatments including effectiveness and safety?          |
| 6.    | Non-pharmacological interventions/Orthotics                                                | What competences do HPRs need to explain the non-pharmacological interventions to people with RMDs and their carers?                   |
| 7.    | Patient and caregiver education (health beliefs, social context, patient attitudes)        | What are the competences required in the role of HPRs in patient and carer education and support to optimize health?                   |
| 8.    | Professionalism/remaining up to date/updating knowledge and skills/CPD                     | How often and how can HPRs update their education and competences?                                                                     |
| 9.    | Goal setting and evaluation; patient support; goal-setting/shared decision making          | What competences do HPRs need to support goal-setting and shared decision making in their practice?                                    |

|     |                                                                               |                                                                                                                                                                                                            |
|-----|-------------------------------------------------------------------------------|------------------------------------------------------------------------------------------------------------------------------------------------------------------------------------------------------------|
| 10. | Health promotion and wellbeing ('maintaining good health')                    | What competences do HPRs need to enable people with RMDs to self-manage?                                                                                                                                   |
| 11. | HPR support to self-manage e.g. identify the needs for specific interventions | a. What competences do HPRs need to support people with RMDs to manage their life with the disease (coping) ?<br>b. What competences do HPRs need to enable people with RMDs to self-manage their disease? |
| 12. | Ability to evaluate effectiveness of interventions on outcomes                | What competences do HPRs need to evaluate the effectiveness of their interventions?                                                                                                                        |
| 13. | Understanding of cost-effective treatment                                     | What competences do HPRs need to understand cost-effective treatment?                                                                                                                                      |

RMDs: Rheumatic and Musculoskeletal Diseases, HPRs: Health Professionals in Rheumatology, CPD: Continuous Professional Development
